# Supplementary material for: A Sphingolipidomic Profiling Approach for Comparing X-ray-Exposed and Unexposed HepG2 Cells
Source: MDPI journal article supplement (doi:10.3390/ijms241512364), 2023-08-02
Supplement: s1 [file s1]

**Table S1.** Assignments of FTIR bands of HepG2 cells lipid extracts according to Refs. Talari 2017, Movasachi 2008 and Dreissing 2009

| Wavenumber (cm <sup>-1</sup> ) | Assignments                                        | Indication                         |
|--------------------------------|----------------------------------------------------|------------------------------------|
| 3402 - 3360                    | N-H stretching                                     | Amide A                            |
| 3018 - 3009                    | CH olefinic stretching                             | Unsaturated fatty acids            |
| 2956 - 2954                    | CH <sub>3</sub> asymmetric stretching              | Saturated fatty acids              |
| 2922 - 2918                    | CH <sub>2</sub> asymmetric stretching              | Saturated fatty acids              |
| 2852 -2851                     | CH <sub>2</sub> symmetric stretching               | Saturated fatty acids              |
| 1741 - 1735                    | C=O stretching                                     | Phospholipids                      |
| 1690 - 1600                    | C=O stretching                                     | Sphingolipids                      |
| 1553 - 1530                    | N-H bending                                        | Sphingolipids                      |
| 1467 - 1467                    | CH <sub>2</sub> bending                            | Fatty acids                        |
| 1412 - 1413                    | CH <sub>2</sub> cyclic bending                     | Cholesterol<br>Cholesterol ester   |
| 1377 - 1353                    | CH <sub>3</sub> bending                            | Fatty acids                        |
| 1230 - 1222                    | PO <sub>2</sub> <sup>-</sup> asymmetric stretching | Phospholipids                      |
| 1181 - 1172                    | C-O asymmetric stretching                          | Phospholipids<br>Cholesterol ester |
| 1087 - 1083                    | PO <sub>2</sub> <sup>-</sup> symmetric stretching  | Phospholipids                      |
| 1064 - 1051                    | C-O-H stretching                                   | Sphingolipids<br>Cholesterol       |
| 1035 - 1020                    | C-O-P stretching                                   | Phospholipids                      |

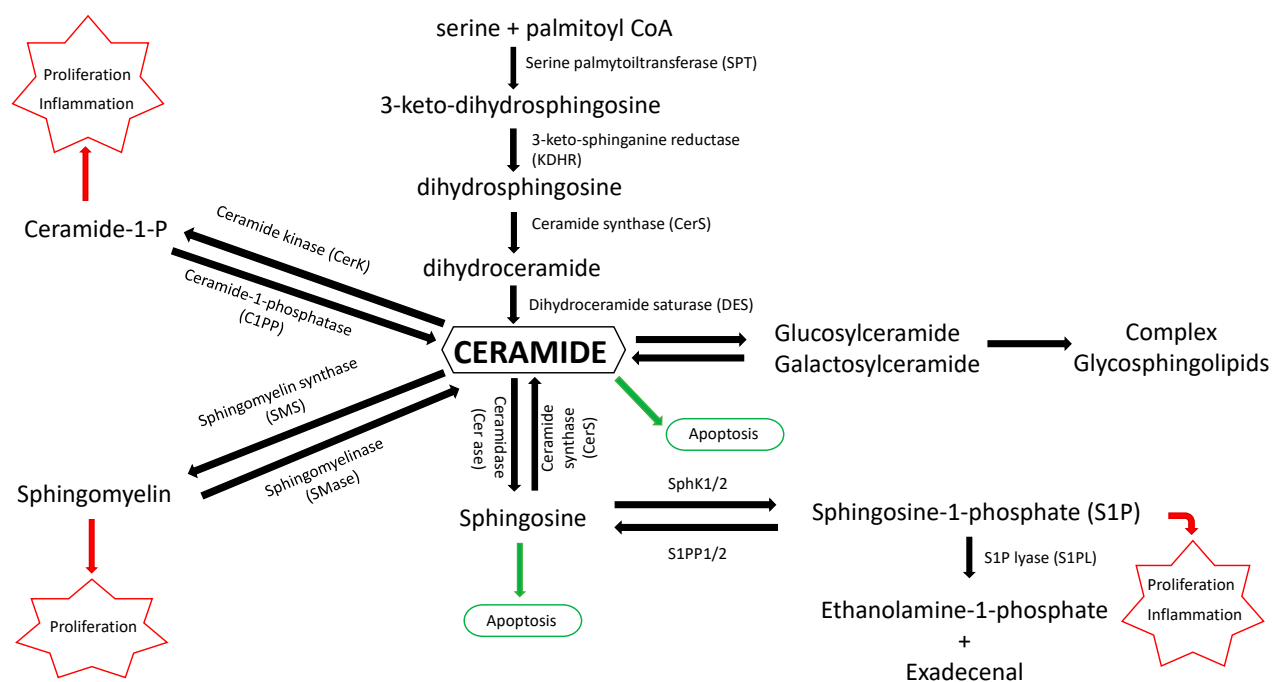

**Figure S1.** Schematic representation of sphingolipid metabolic network.

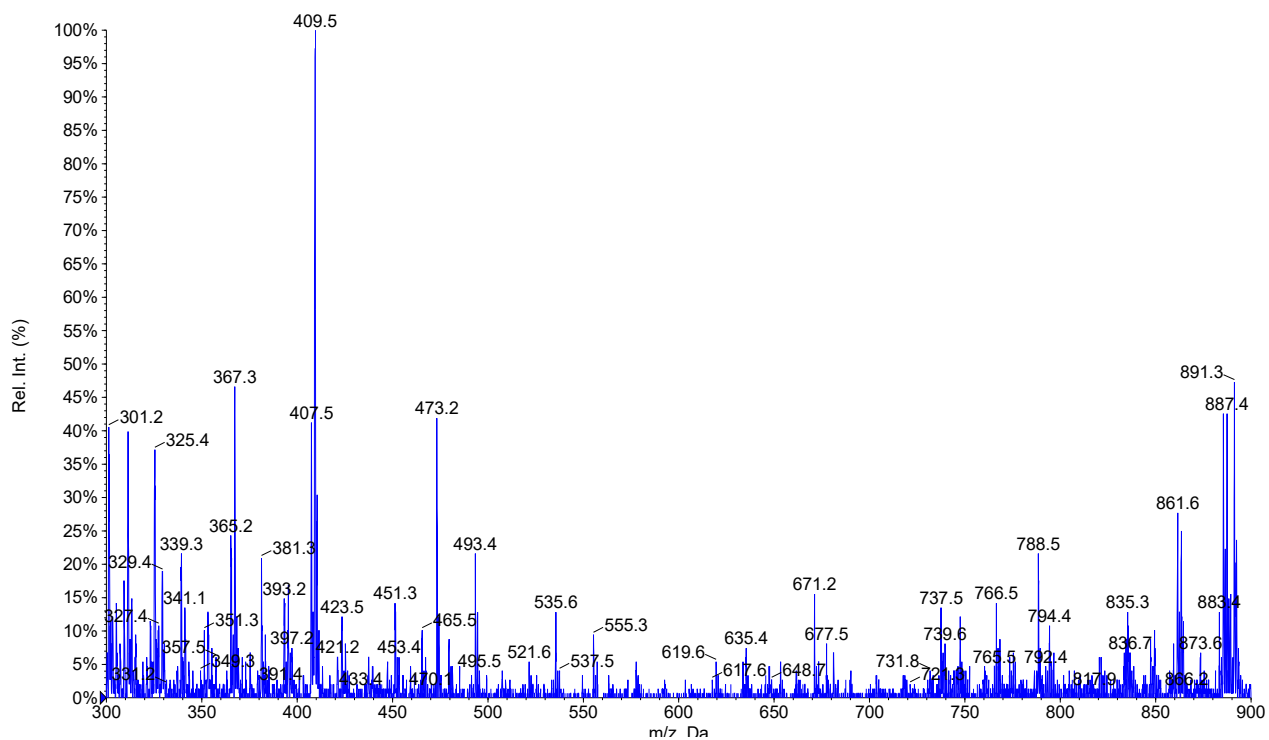

(a)

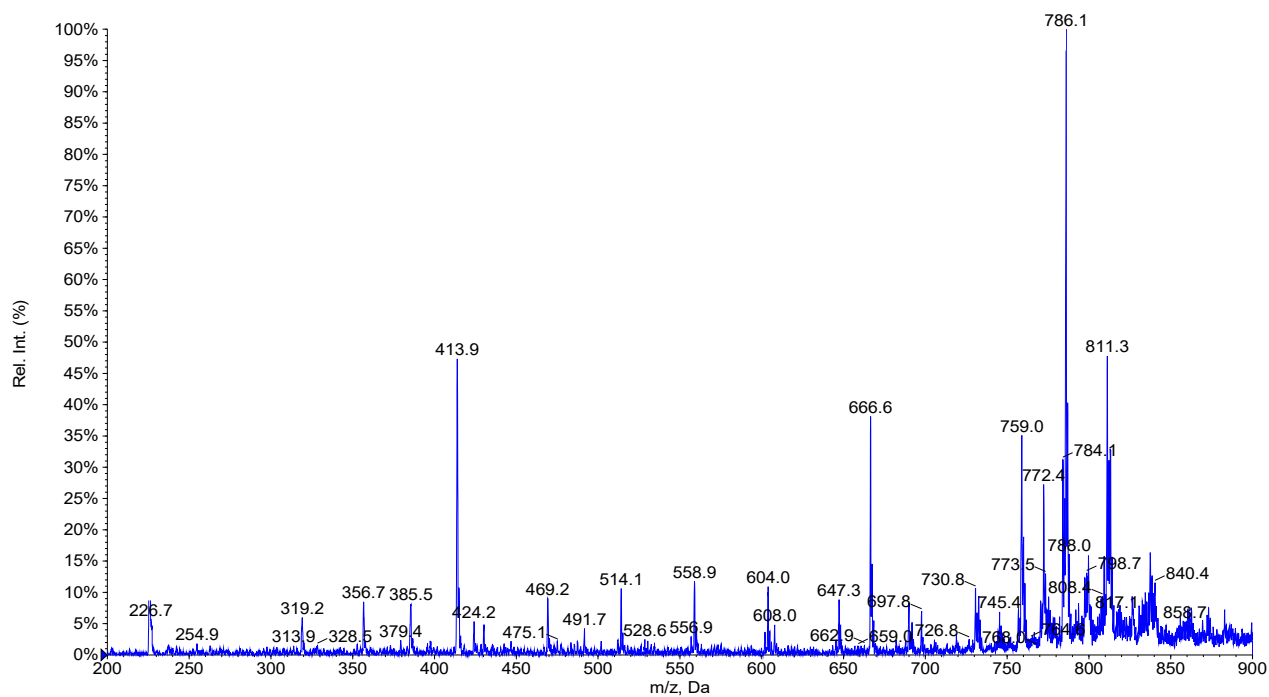

(b)

**Figure S2.** Representative mass spectra of samples obtained by BuMe modified method using unirradiated HepG2 cells: (a) in negative mode; (b) in positive mode.

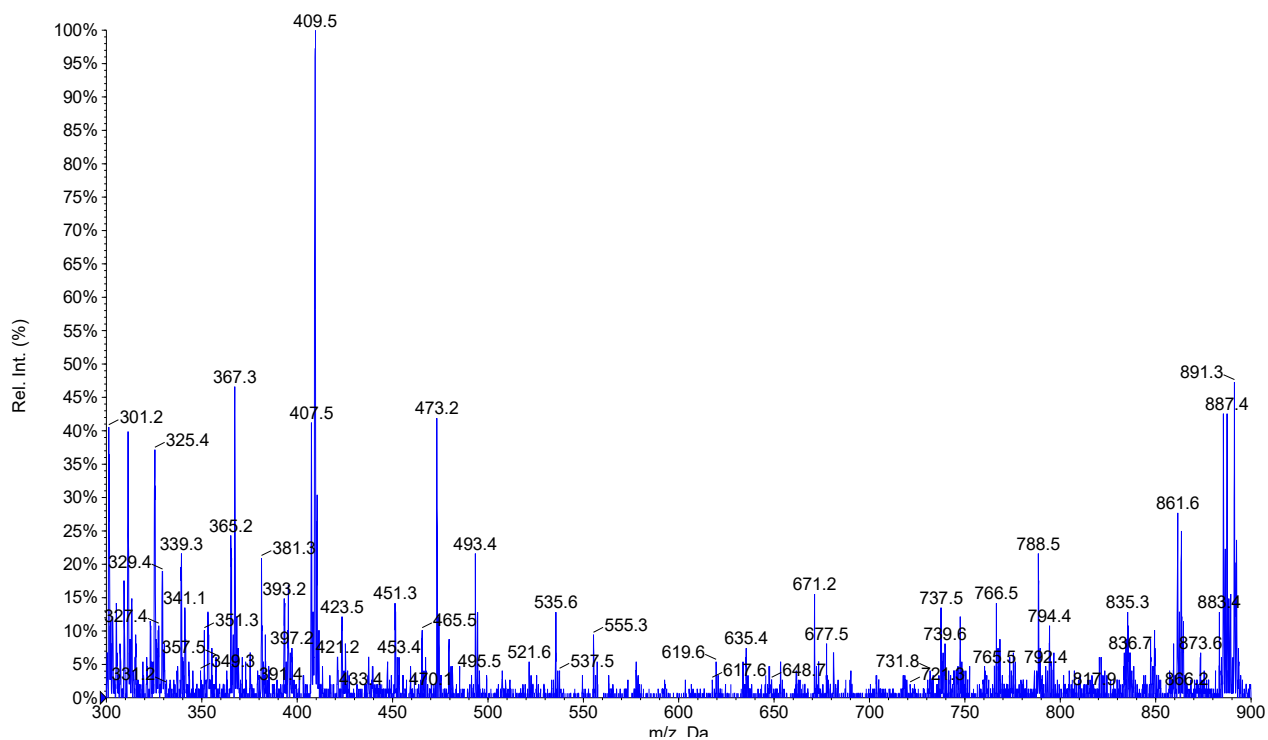

(a)

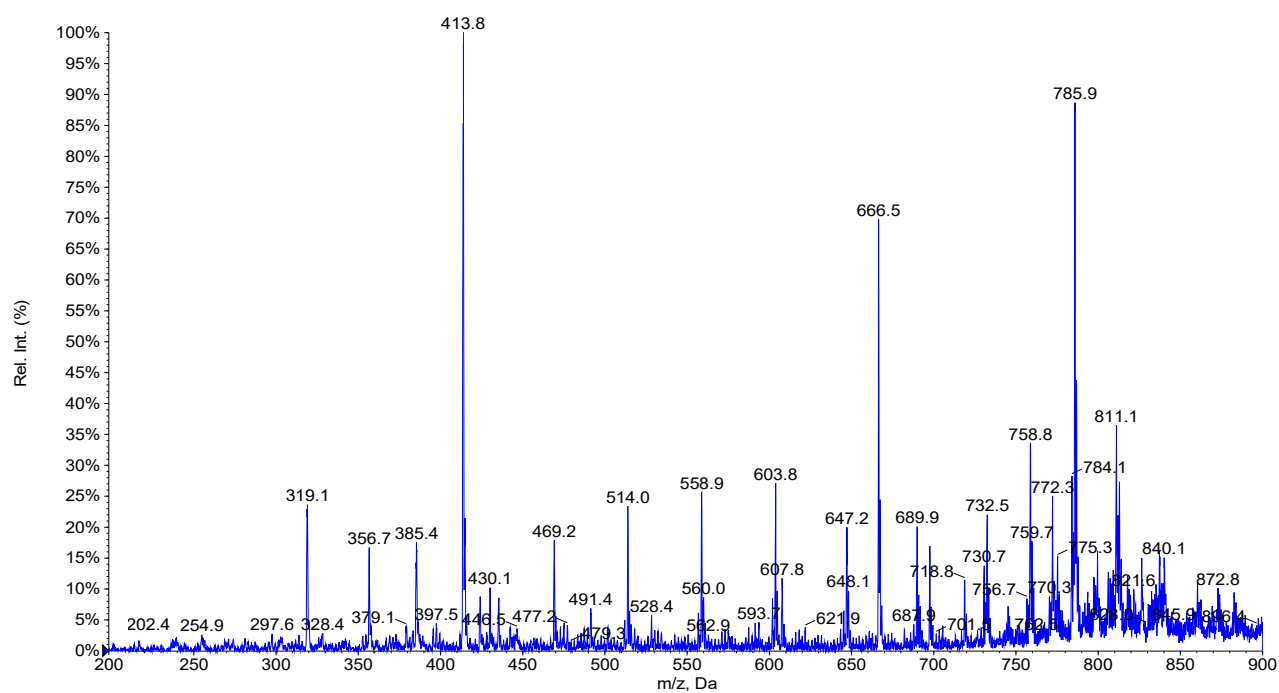

(b)

**Figure S3.** Representative mass spectra of samples obtained by SHA method using unirradiated HepG2 cells: (a) in negative mode; (b) in positive mode.

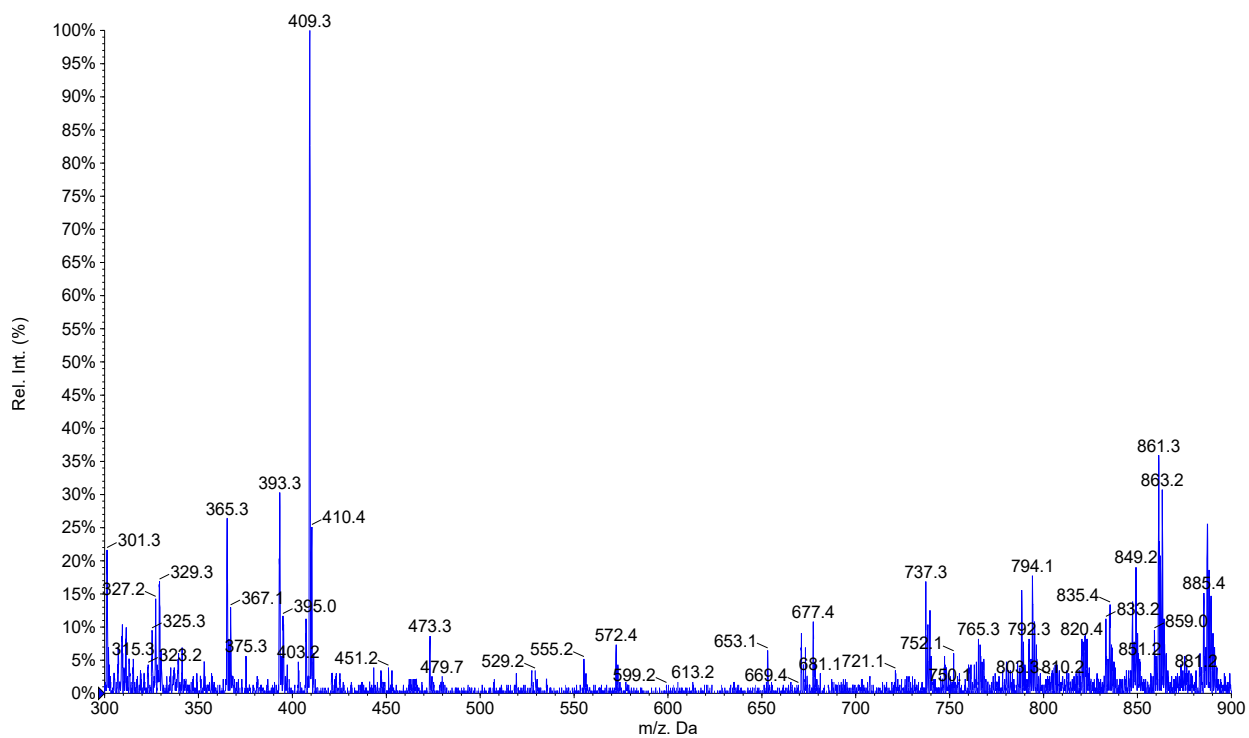

(a)

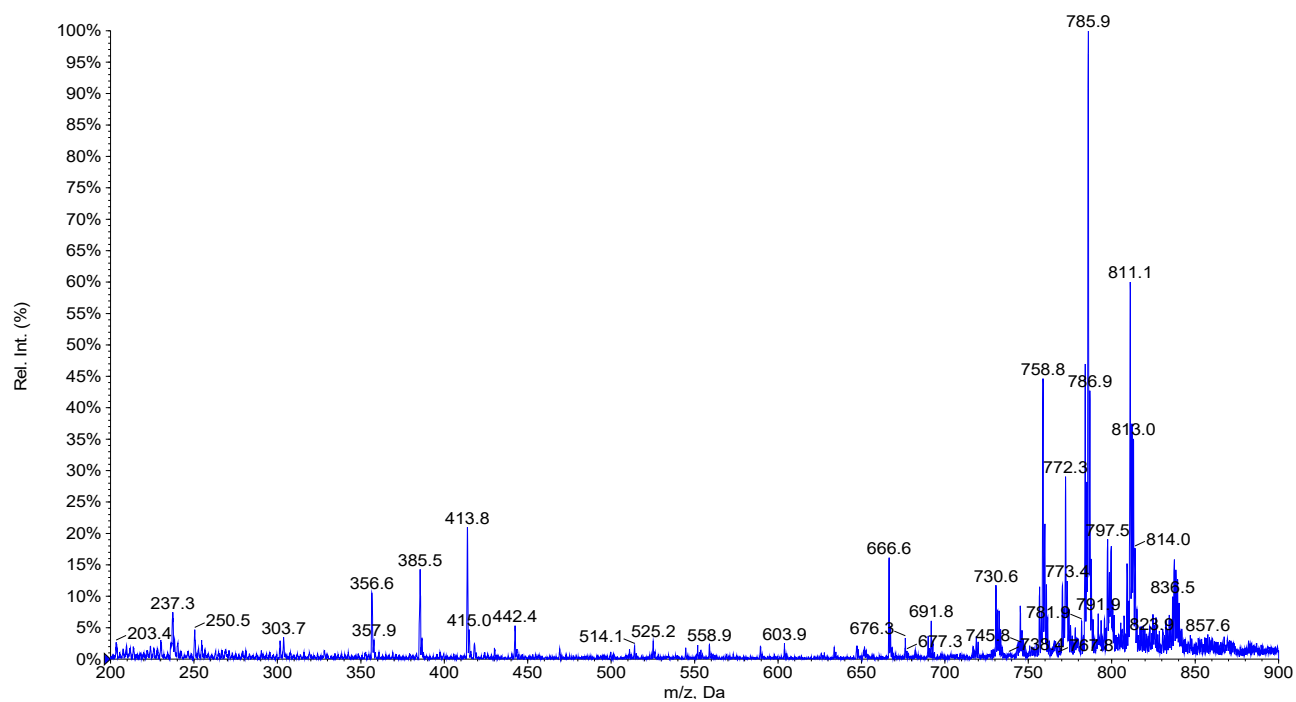

(b)

**Figure S4.** Representative mass spectra of samples obtained by IPA method using unirradiated HepG2 cells: (a) in negative mode; (b) in positive mode.
